# Supplementary material
Source: MDPI journal article supplement (https://www.mdpi.com/2571-8789/6/4/88)
Supplement: s1 [file s1]

Supplementary Material

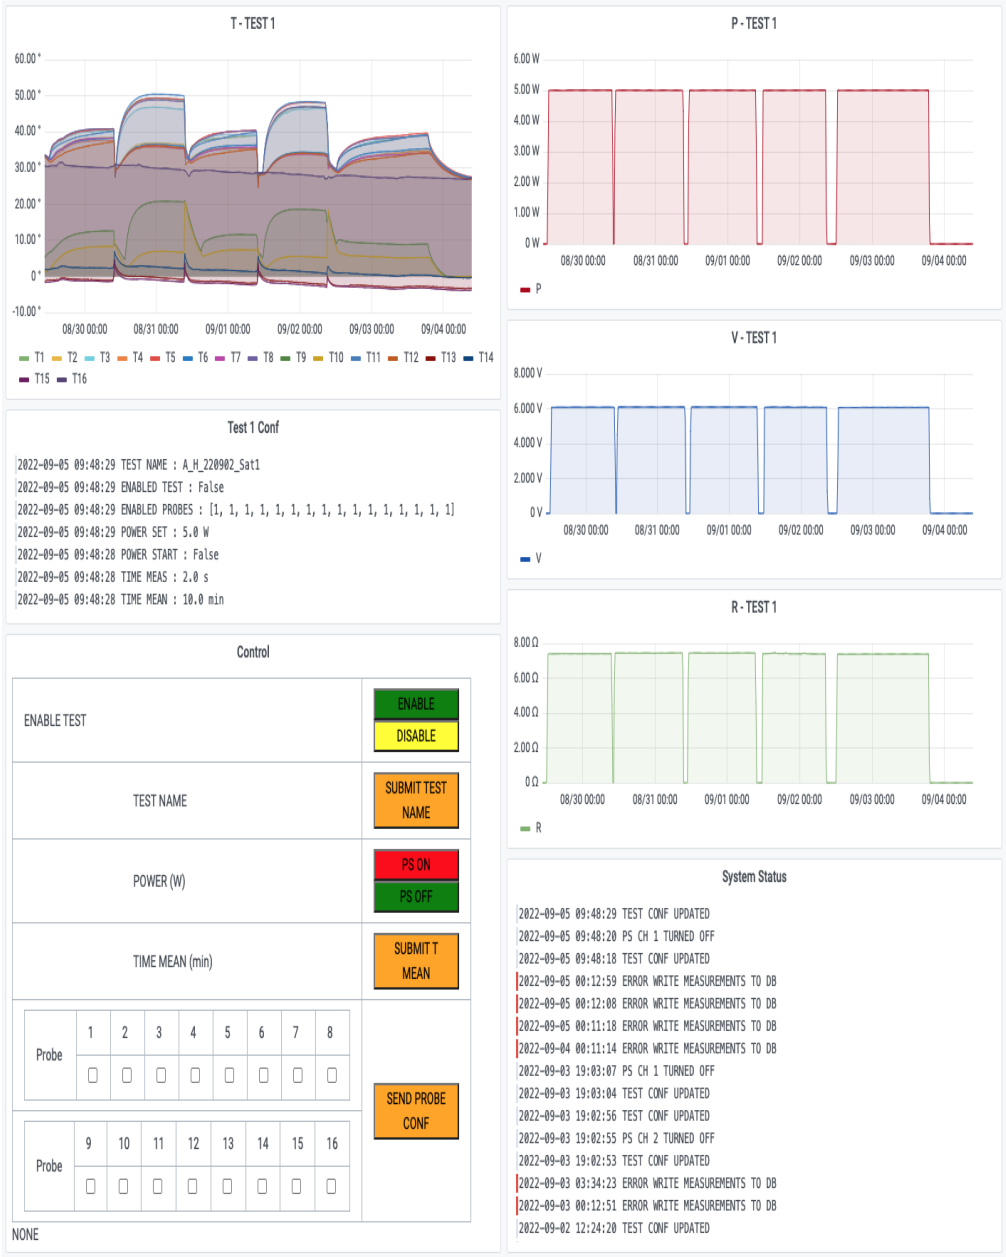

**Table S1:** Available information about the tested materials considered in this paper. Mineralogical and textural characteristics of the materials used by the different Authors for obtaining the thermal conductivity and referred to in the present paper for comparison with our results. Qz: quartz; Pl: Plagioclase; Or: Orthoclase; Px: Pyroxene; Kln: Kaoline.

| bulk density                      | mineralogy                                          | grain size                           |
|-----------------------------------|-----------------------------------------------------|--------------------------------------|
|                                   |                                                     | gravel / sand / silt / clay [%]      |
| Roshankhah et al. (2020) [39]     |                                                     |                                      |
| 1693                              | >90% Qz                                             | graded quarzitic sand (D50 = 300 μm) |
| 1575                              | 99% Qz                                              | silica flour (D50 = 20 μm)           |
| Chen (2008) [26]                  |                                                     |                                      |
|                                   | 99% Qz                                              | uniform medium sand                  |
|                                   | 99% Qz                                              | uniform coarse sand                  |
|                                   | 99% Qz                                              | uniform silty sand                   |
|                                   | 99% Qz                                              | well graded medium sand              |
| Abu-Hamdeh et al. (2001) [41]     |                                                     |                                      |
| 1060-1430                         |                                                     | – / 95.75 / 4.15 / 0.10              |
| 1180-1410                         |                                                     | – / 75 / 9 / 16                      |
| 1200-1410                         |                                                     | – / 40 / 36 / 24                     |
| 1100-1490                         |                                                     | – / 21-4 / 39 / 39.6                 |
| Abu-Hamdeh & Reeder (2000)        |                                                     |                                      |
| 1250-1600                         |                                                     | – / 95 / 4 / 1                       |
| 1210-1400                         |                                                     | – / 75 / 9 / 16                      |
| 1250-1400                         |                                                     | – / 40 / 36 / 24                     |
| 1320-1500                         |                                                     | – / 21 / 39 / 40                     |
| Nusier and Abu-Hamdeh (2003) [1]  |                                                     |                                      |
| 1250-1460                         |                                                     | – / 95 / 4 / 1                       |
| 1250-1460                         |                                                     | – / 40 / 35 / 25                     |
| Barry Macaulay et al. (2013) [43] |                                                     |                                      |
| 1150-1500                         | 50-66% Qz, 3-5% Or, 3-18 Kln, 2-10 smectite         | fine grain soils (< 21% sand)        |
| 1300-1800                         | 63-92% Qz, 8-33% Kln                                | coarse grain soils (> 60% sand)      |
| Lu et al. (2007) [11]             |                                                     |                                      |
| 1290                              |                                                     | – / 32 / 38 / 30                     |
| 1200                              |                                                     | – / 2 / 73 / 25                      |
| 1380                              |                                                     | – / 50 / 41 / 9                      |
| 1580                              |                                                     | – / 92 / 7 / 1                       |
| Farouki (1981) [18]               |                                                     |                                      |
|                                   | 43.1% Qz; 11.6 Or; 12: Pl; 27% Px; 5.4% others      | 80 / 19.4 / 0.3 / 0.3                |
|                                   | 15->95% Qz; 10-30% Or; 13-50% Pl; 27-34% Px; others | 0-27 / 63-99 / 2-5 / 2-5             |
|                                   | 59->99% Qz; 3.6-20,5% Or; 5.3-9% Pl; others         | 0-27 / 0-99 / 0-3 / 0-3              |
|                                   | 12% Qz; 7% Or; 18% Pl; 12% Px; others               | 0 / 97 / 3 / 0                       |
|                                   | 4.6-13.3% Qz; 0-2% Px; 28.3-28.9% Kln; others       | 1-11 / 54-58 / 21-28 / 10-19         |
|                                   | 22% Qz; 55% Kln                                     | 0 / 2 / 20 / 78                      |
| Johansen (1975) [24]              |                                                     |                                      |
| 2600-2850                         | 39-100% Qz                                          | sand                                 |
| 2700-3000                         | 2-57% Qz                                            | gravel                               |
| 2130-3000                         | 2-33% Qz                                            | crushed rock                         |
| 2800                              | 22% Qz                                              | clay                                 |
| Kersten (1949) [17]               |                                                     |                                      |
| 1750                              | >95% Qz                                             | crushed quartz (15 / 79 / 0-5 / 0-5) |

|                         |                                            |                                              |
|-------------------------|--------------------------------------------|----------------------------------------------|
| 1900                    | 20% Qz; 30% Or; 40% Pl; 10% others         | crushed granite (16 / 77 / 0-7 / 0-7)        |
| 1650                    | 3% Qz; 10% Or; 50% Pl; 34% Px; 3% others   | crushed trap rock (27 / 63 / 0-10 / 0-10)    |
| 1800                    | 72% Qz; 20% Or; 3% Px; 5% others           | Lowell sand (0 / 100 / 0 / 0)                |
| 1700                    | 59% Qz; 13% Or; 12% Px; 12% Kln; 4% others | Dakota Sandy Loam (11 / 58 / 21 / 10)        |
| 1500                    | 13% Qz; 28% Kln; 18% mica                  | Fairbanks Silt Loam (0 / 8 / 81 / 11)        |
| <b>present research</b> |                                            |                                              |
| 1430-1630               | >90% Qz , >5% carbonate, <5% others        | intermediate Po River sands (5 / 95 / 0 / 0) |
| 1000-1300               | >90% Qz , <5% carbonate, <5% others        | lower Po River silty-clay (0 / 5 / 90 / 5)   |
